# Supplementary material for: Rac1 functions as a reversible tension modulator to stabilize VE-cadherin trans-interaction
Source: PubMed Central journal article supplement — J Cell Biol. 2015 Jan 5;208(1):23–32. doi: 10.1083/jcb.201409108 (PMC4284224; doi:10.1083/jcb.201409108), 2015-01-05
Supplement: supp_jcb.201409108_JCB_201409108_sm.pdf [file supp_jcb.201409108_JCB_201409108_sm.pdf]

Daneshjou et al., <http://www.jcb.org/cgi/content/full/jcb.201409108/DC1>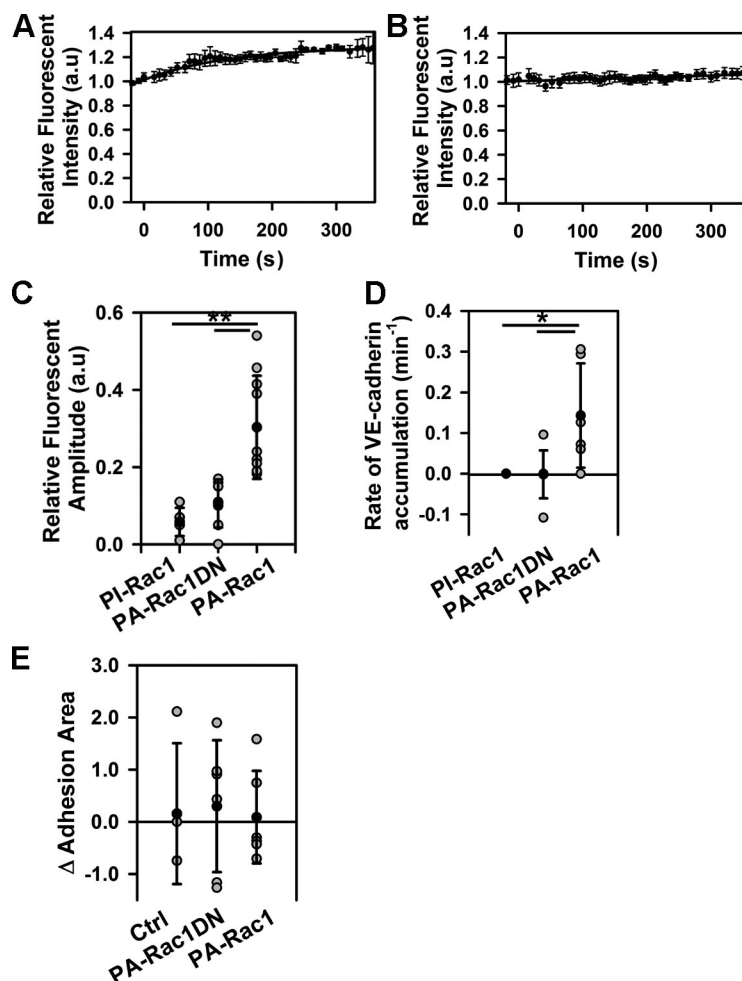

Figure S1. **Activation of PA-Rac1 increases VE-cadherin density without affecting the area of adhesion zone.** (A and B) Relative changes in VE-cadherin-GFP fluorescent intensity after activation of PA-Rac1 (A) or PA-Rac1DN (B) in HMECs. Analyses are performed as in Fig. 1; means  $\pm$  SEM,  $n = 8-10$ . (C) Amplitude of VE-cadherin-GFP accumulation after activation of PI-Rac1 ( $0.06 \pm 0.04$ ), PA-Rac1DN ( $0.11 \pm 0.06$ ), or PA-Rac1 ( $0.30 \pm 0.13$ ); means  $\pm$  SD,  $n = 5-10$ ; \*\*,  $P < 0.005$ . (D) Rate constant for VE-cadherin-GFP accumulation after activation of PA-Rac1 was  $0.14 \pm 0.13 \text{ min}^{-1}$ , whereas no significant changes were observed after activation of PI-Rac1 or PA-Rac1DN; means  $\pm$  SD,  $n = 5-8$ ; \*,  $P < 0.05$ . (E) Changes in VE-cadherin adhesion area within irradiation zone after activation of PA-Rac1 or PA-Rac1DN and in adjacent cells (Ctrl, control). Means  $\pm$  SD,  $n = 4-6$ . a.u., arbitrary unit.

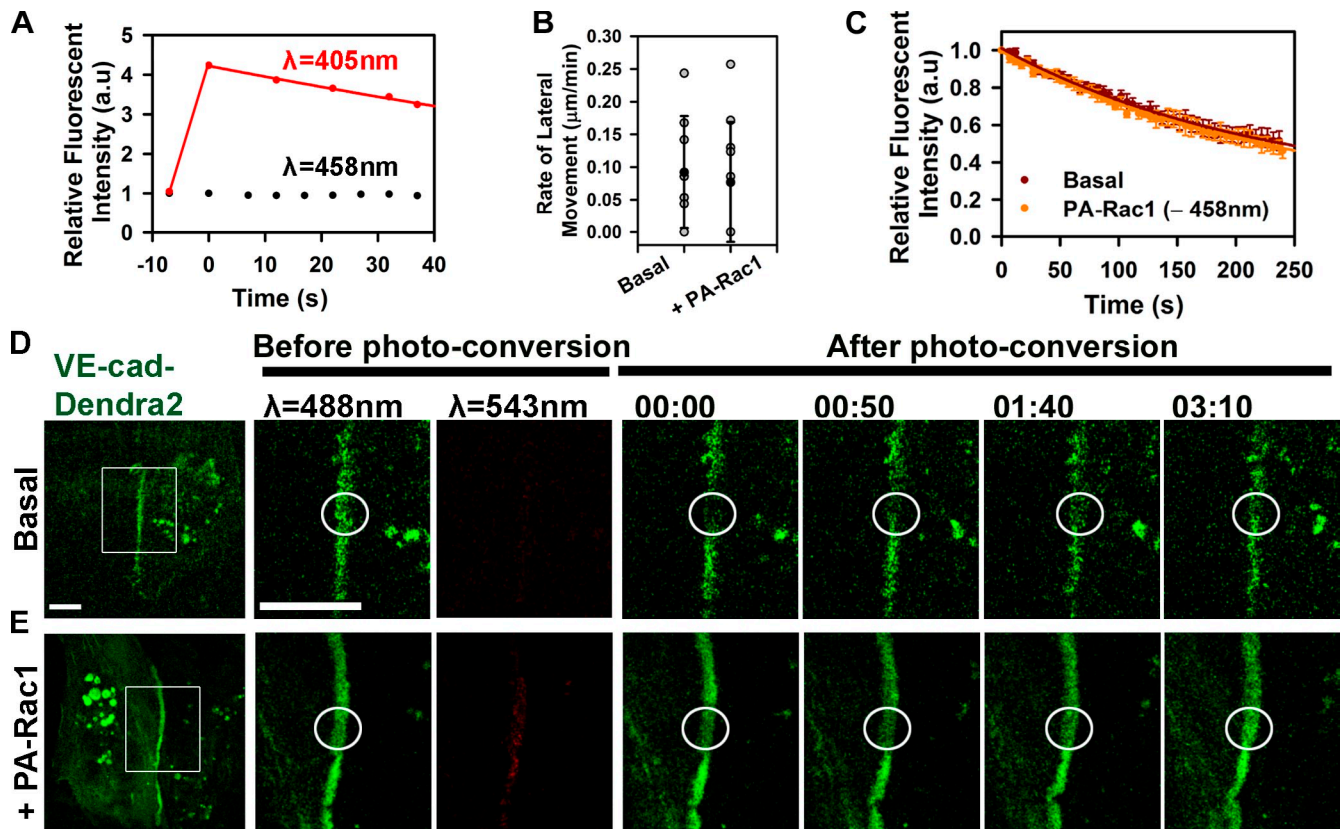

Figure S2. **Effects of Rac1 on VE-cadherin kinetics.** (A) Changes in fluorescent emission at 543 nm after irradiation of VE-cadherin–Dendra2 with  $\lambda = 405\text{-nm}$  and  $\lambda = 458\text{-nm}$  laser beams at time 0. Representative tracers from reproducible datasets of  $n = 7$  and 3, respectively. (B) Rate of lateral movement of VE-cadherin–Dendra2 for basal condition ( $0.09 \pm 0.09 \mu\text{m}/\text{min}$ ) and after PA-Rac1 activation ( $0.08 \pm 0.09 \mu\text{m}/\text{min}$ ); means  $\pm$  SD;  $n = 8\text{--}10$ . (C) Cells were transfected with VE-cadherin–Dendra2 alone or with PA-Rac1. Changes in relative fluorescent intensity of VE-cadherin–Dendra2 were monitored after Dendra2 photoconversion; no PA-Rac1 activation was performed; means  $\pm$  SEM,  $n = 3$  and 7. (D and E) Time-lapse images of VE-cadherin–Dendra2 (VE-cad-Dendra2) emission at 488 nm before and after photoconversion within the circular region under basal condition (D) and after activation of PA-Rac1 (E). Boxes are magnified on the right. Time is given in minutes and seconds. Bars, 10  $\mu\text{m}$ . a.u., arbitrary unit.

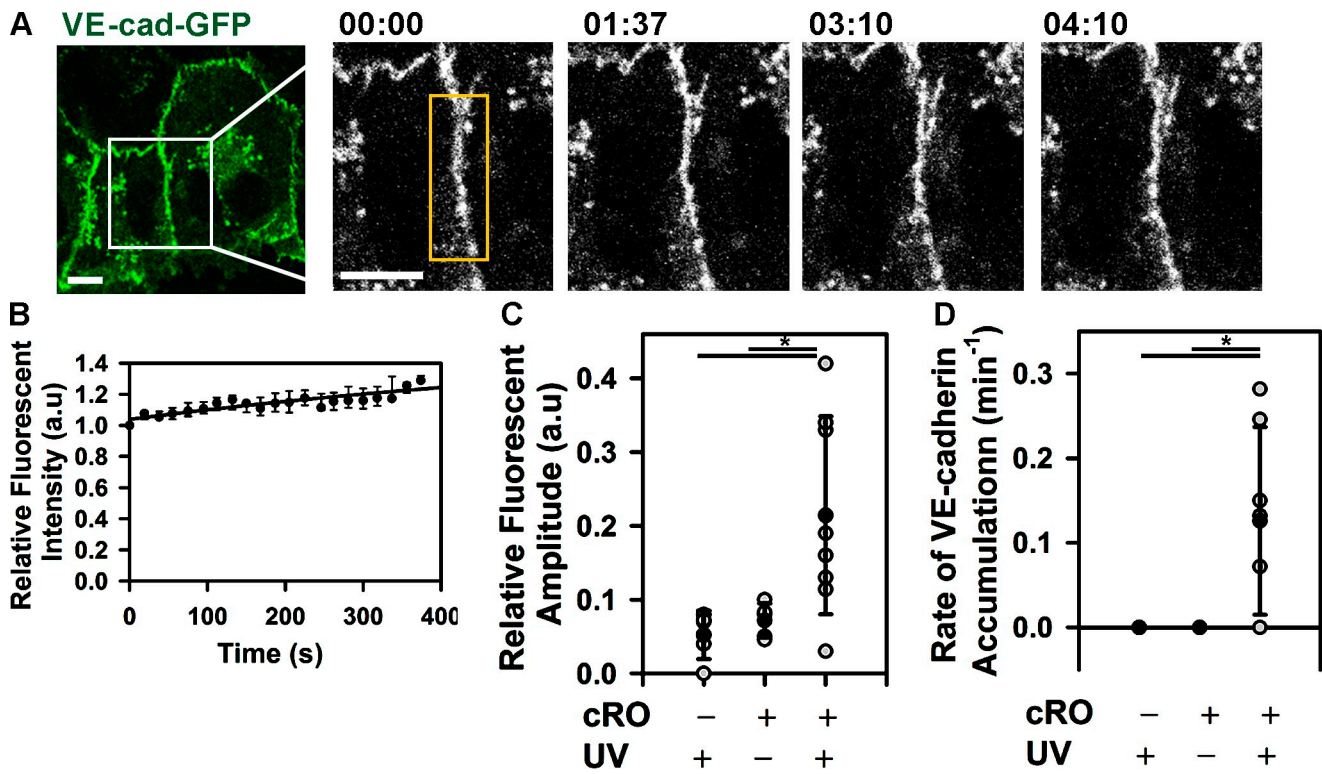

Figure S3. **Spatial inhibition of ROCK at AJs increases VE-cadherin density.** (A) Time-lapse images of VE-cadherin-GFP (VE-cad-GFP) before and after cRO uncaging within the rectangular region at time 0. Bars, 10  $\mu\text{m}$ . (B) Relative changes in VE-cadherin-GFP fluorescent intensity at AJs after cRO uncaging fitted to an exponential rise; means  $\pm$  SEM,  $n = 8$ . (C) Amplitude of VE-cadherin-GFP accumulation at AJs in cells irradiated with 405 nm ( $0.05 \pm 0.03$ ) or treated with cRO without ( $0.07 \pm 0.02$ ) and with uncaging ( $0.21 \pm 0.13$ ); means  $\pm$  SD,  $n = 5-8$ ; \*,  $P < 0.05$ . (D) Rate constant for VE-cadherin-GFP accumulation after cRO uncaging was  $0.13 \pm 0.11 \text{ min}^{-1}$ , whereas no significant changes were observed in cells irradiated with a 405-nm laser beam or cells treated with caged cRO;  $n = 5-7$ ; \*,  $P < 0.05$ . a.u., arbitrary unit.
